# Supplementary material for: Tubular Cell Dropout in Preimplantation Deceased Donor Biopsies as a Predictor of Delayed Graft Function
Source: PubMed Central journal article supplement (PMC8384397; doi:10.1097/txd.0000000000001168), 2021-06-18
Supplement: txd-7-e716-s001.pdf [file txd-7-e716-s001.pdf]

| Antigen                       | Target                                       | Species    | Clone      | Dilution | Metal             | Supplier                 |
|-------------------------------|----------------------------------------------|------------|------------|----------|-------------------|--------------------------|
| DNA intercalator              | Nucleus                                      | N/A        | N/A        | 1:1000   | <sup>191</sup> Ir | Fluidigm                 |
| DNA intercalator              | Nucleus                                      | N/A        | N/A        | 1:1000   | <sup>193</sup> Ir | Fluidigm                 |
| $\beta$ -catenin              | Tubular epithelium                           | mouse      | D13A1      | 1:250    | <sup>165</sup> Ho | Fluidigm                 |
| Megalin                       | Proximal tubule                              | mouse      | 10D5.1     | 1:250    | <sup>174</sup> Yb | EMD Millipore            |
| Aquaporin-1                   | Proximal tubule                              | rabbit     | EPR11588   | 1:2000   | <sup>173</sup> Yb | Abcam                    |
| Tamm-Horsfall protein         | Ascending limb of the Loop of Henle          | rat        | 774056     | 1:1600   | <sup>151</sup> Eu | R&D Systems              |
| Calbindin                     | Distal convoluted tubule                     | mouse      | 401025     | 1:400    | <sup>142</sup> Nd | Thermo Fisher Scientific |
| Aquaporin-2                   | Collecting duct (principal cell)             | rabbit     | EPR21080   | 1:300    | <sup>172</sup> Yb | Abcam                    |
| Cytokeratin-7                 | Connecting tubule, collecting duct           | mouse      | RCK105     | 1:150    | <sup>164</sup> Dy | Fluidigm                 |
| CD31                          | Endothelium                                  | mouse      | JC/70A     | 1:100    | <sup>149</sup> Sm | Abcam                    |
| Nestin                        | Podocyte                                     | mouse      | 196908     | 1:200    | <sup>146</sup> Nd | Fluidigm                 |
| $\alpha$ -Smooth muscle actin | Smooth muscle                                | mouse      | 1A4        | 1:1600   | <sup>141</sup> Pr | Fluidigm                 |
| Vimentin                      | Fibroblast, pericyte, mesangium,<br>podocyte | mouse      | RV202      | 1:500    | <sup>150</sup> Nd | Abcam                    |
| Collagen IV                   | Basement membrane, fibrosis                  | mouse      | 1042       | 1:200    | <sup>166</sup> Er | Thermo Fisher Scientific |
| Renin                         | Juxtaglomerular cell                         | rabbit     | EPR20693   | 1:1000   | <sup>171</sup> Yb | Abcam                    |
| CD68                          | Macrophage                                   | mouse      | KP1        | 1:600    | <sup>159</sup> Tb | Fluidigm                 |
| CD66b                         | Granulocyte                                  | mouse      | 80H3       | 1:200    | <sup>152</sup> Sm | Fluidigm                 |
| CD3                           | T lymphocyte                                 | polyclonal | polyclonal | 1:80     | <sup>170</sup> Er | Fluidigm                 |
| CD4                           | Helper T lymphocyte                          | rabbit     | EPR6855    | 1:100    | <sup>156</sup> Gd | Fluidigm                 |
| CD8a                          | Cytotoxic T lymphocyte                       | mouse      | C8/144B    | 1:100    | <sup>162</sup> Dy | Fluidigm                 |
| CD20                          | B lymphocyte                                 | mouse      | H1         | 1:100    | <sup>161</sup> Dy | Fluidigm                 |
| Ki67                          | Proliferation                                | mouse      | B56        | 1:100    | <sup>168</sup> Er | Fluidigm                 |
| KIM-1                         | Epithelial injury                            | mouse      | 219211     | 1:75     | <sup>160</sup> Gd | R&D Systems              |

**Table S1: IMC antibody panel. KIM-1=kidney injury molecule-1.**

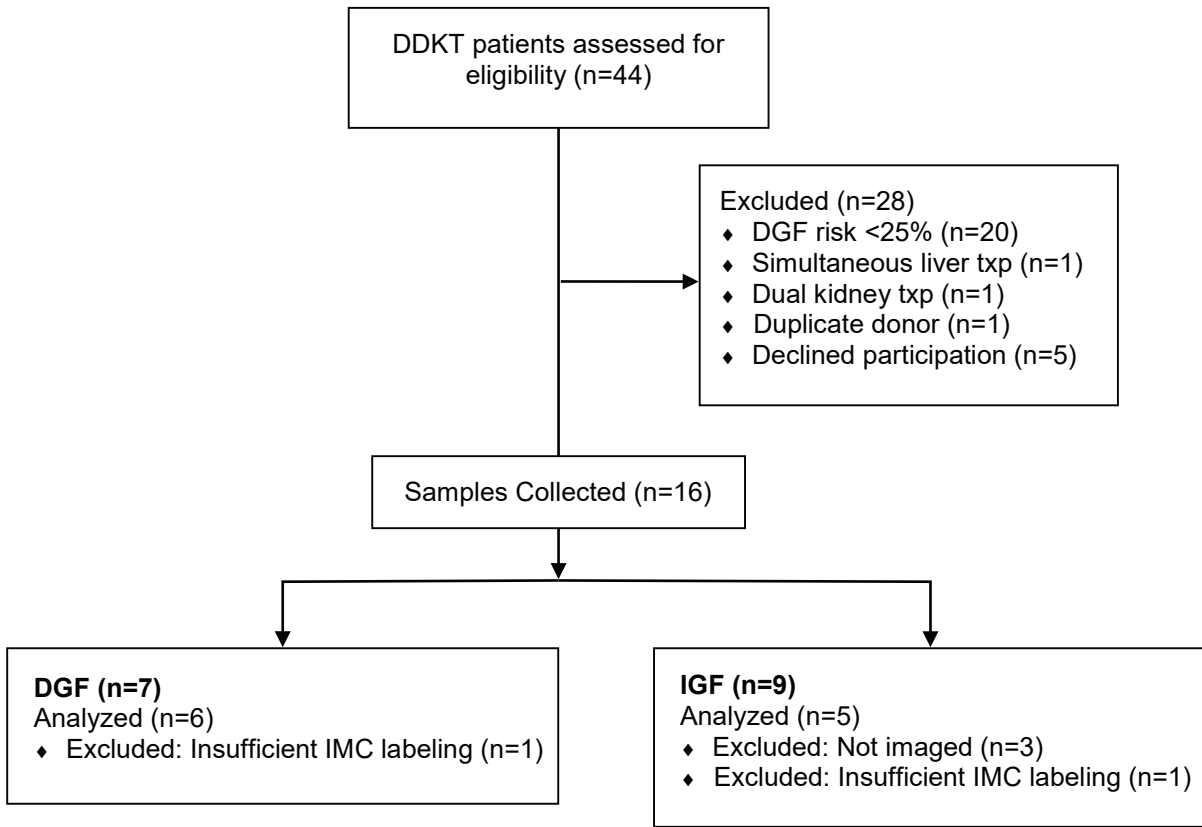

**Figure S1: DDKT patient enrollment and sample analysis.**

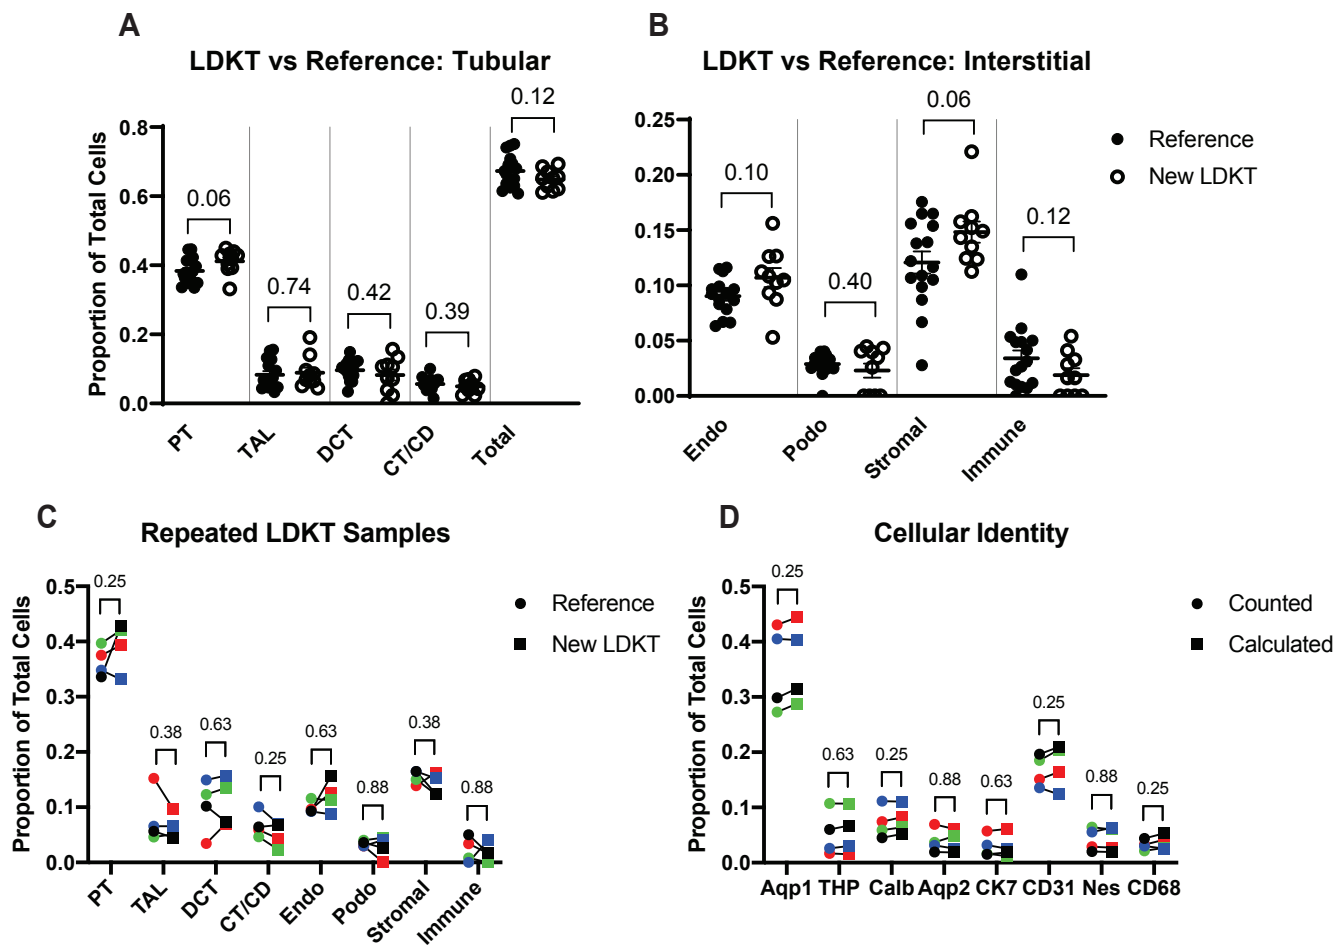

**Figure S2: Validation of LDKT cohort and IMC analysis pipeline in injured tissue. (A-B)**

The current set of 10 LDKT samples was compared to the reference data set in Singh et al.<sup>28</sup> for tubular (A) and interstitial (B) cell proportions. No significant differences were found in any cell population, with p values shown, confirming the utility of this LDKT set as a control group. (C) Four living donor biopsies included in both the reference data set (circles) and the current LDKT panel (squares) were compared for cell proportions, with each biopsy sample shown in a different color. No significant differences were found in any cell population, with p values shown, highlighting the reproducibility of IMC in the human kidney. (D) Over 8000 cells from four representative deceased donor regions were manually counted and scored for positivity of eight protein markers defining key tubular, endothelial, glomerular, and immune cell types, followed by comparison to results from the automated pipeline. There were no significant differences between the counted (circles) or calculated (squares) proportions of any cell phenotype, with p values shown. PT=proximal tubule; TAL=thick ascending limb of Loop of Henle; DCT=distal convoluted tubule; CT/CD=connecting tubule/collecting duct; Endo=endothelium; Podo=podocytes; Aqp1=aquaporin-1; THP=Tamm-Horsfall protein; Calb=calbindin; Aqp2=aquaporin-2; CK7=cytokeratin-7; Nes=nestin.
